# Supplementary material for: Potential problems of removing one invasive species at a time: a meta-analysis of the interactions between invasive vertebrates and unexpected effects of removal programs
Source: PubMed Central journal article supplement (PMC4893336; doi:10.7717/peerj.2029), 2016-06-02
Supplement: peerj-04-2029-s002.pdf [file peerj-04-2029-s002.pdf]

Supporting Information 2

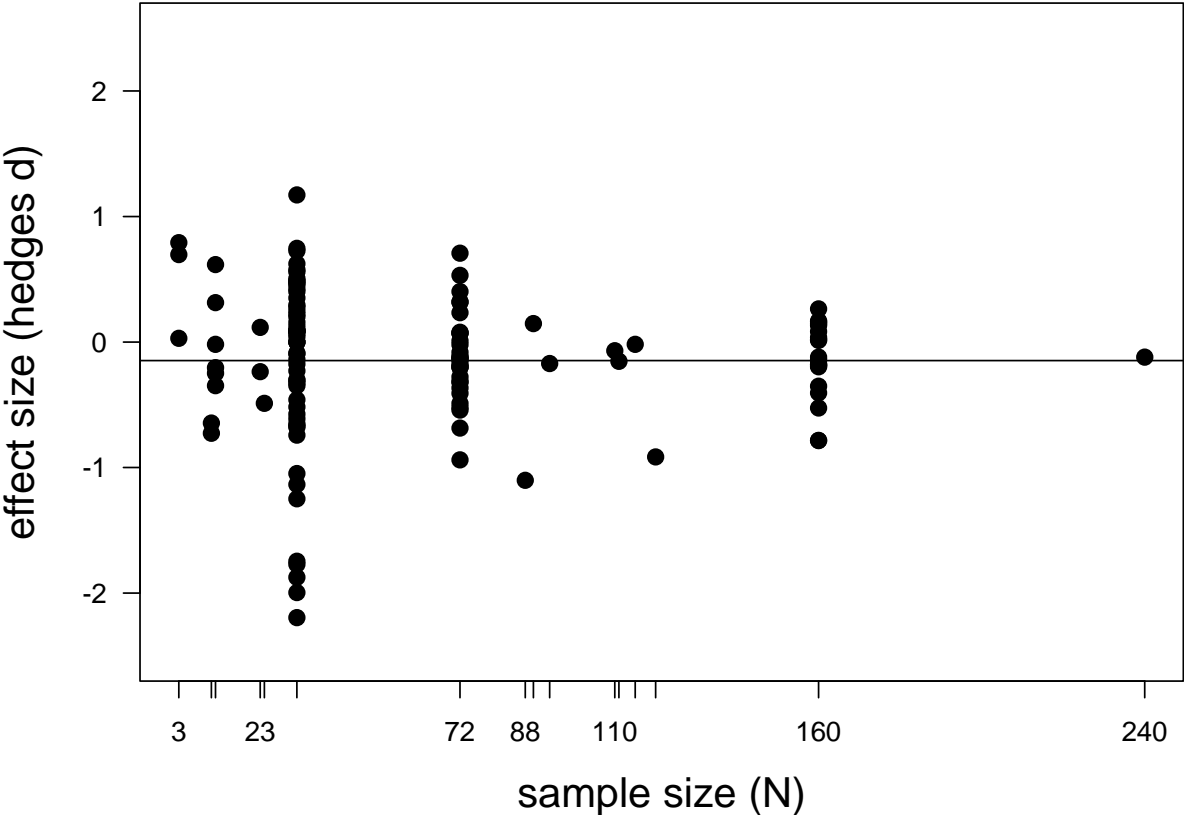

Figure 4. Funnel plot analysis of sample size against the Hedges' d value.
